# Supplementary material for: First-line treatment with infliximab versus conventional treatment in children with newly diagnosed moderate-to-severe Crohn’s disease: an open-label multicentre randomised controlled trial
Source: HighWire-hosted journal article supplement (doi:10.1136/gutjnl-2020-322339), 2020-12-31
Supplement: gutjnl-2020-322339supp001_data_supplement.pdf [file gutjnl-2020-322339supp001_data_supplement.pdf]

## SUPPLEMENTAL TABLES

|                   | First-line IFX<br>n=35 | Conventional<br>n=39 | P-value |
|-------------------|------------------------|----------------------|---------|
| 6-MMP levels      | 1400 (800-2700)        | 1500 (597-2875)*     | 0.818   |
| 6-TGN levels      | 567 (438-660)          | 490 (224-650)        | 0.258   |
| 6-MMP/6-TGN ratio | 3.21 (1.57-5.38)       | 2.91 (1.25-6.35)*    | 0.881   |

**Supplemental Table 1.** Azathioprine metabolites measured according to clinical practice. \*Three out of 29 6MMP levels were missing. IFX=infliximab; 6 MMP=6-methylmercaptopurine; 6 TGN=6-thioguanine nucleotide.

|                                                                       |             | Exclusive enteral nutrition (n=27) | Oral prednisolone (n=20) | P value |
|-----------------------------------------------------------------------|-------------|------------------------------------|--------------------------|---------|
| <b>Age at diagnosis, years</b>                                        |             | 14.5 (12.4-16.5)                   | 13.8 (11.6-15.6)         | 0.282   |
| <b>Male sex</b>                                                       |             | 16 (59%)                           | 10 (50%)                 | 0.528   |
| <b>Height, cm</b>                                                     |             | 164.3 (149.2-175.0)                | 157.4 (143.5-16.6)       | 0.169   |
| <b>Weight, kg</b>                                                     |             | 48.5 (33.8- 56.3)                  | 41.8 (31.1-53.9)         | 0.240   |
| <b>wPCDAI</b>                                                         |             | 60.0 (48.8-67.8)                   | 53.8 (45.6-81.3)         | 0.909   |
| <b>CRP, mg/L</b>                                                      |             | 34.5 (24.7-65.9)                   | 39.5 (20.5-69.0)         | 0.921   |
| <b>ESR, mm/hour</b>                                                   |             | 27.0 (17.0-47.5)                   | 34.0 (22.5-71.0)         | 0.091   |
| <b>SES-CD</b>                                                         |             | 15 (6-22)                          | 19 (6-28)                | 0.275   |
| <b>Leukocytes, 10<sup>9</sup>/L</b>                                   |             | 8.9 (6.8-11.7)                     | 9.1 (6.2-11.8)           | 0.982   |
| <b>Faecal calprotectin, µg/g</b>                                      |             | 1197 (1033-1661)                   | 592 (555-1133)           | 0.014   |
| <b>Perianal disease†</b>                                              |             | 5 (19%)                            | 4 (20%)                  | 0.898   |
| <b>Paris classification</b>                                           |             |                                    |                          |         |
| <b>Age at diagnosis</b>                                               | <10 years   | 4 (15%)                            | 3 (15%)                  | 0.757   |
|                                                                       | 10-17 years | 20 (74%)                           | 16 (80%)                 |         |
|                                                                       | 17-40 years | 3 (11%)                            | 1 (5%)                   |         |
| <b>Disease location</b>                                               | L1          | 6 (22%)                            | 5 (25%)                  | 0.755   |
|                                                                       | L2          | 6 (22%)                            | 6 (35%)                  |         |
|                                                                       | L3          | 15 (56%)                           | 9 (45%)                  |         |
|                                                                       | Isolated L4 | -                                  | -                        |         |
| <b>Upper disease location</b>                                         | No upper GI | 14 (52%)                           | 11 (55%)                 | 0.942   |
|                                                                       | L4a         | 12 (44%)                           | 8 (45%)                  |         |
|                                                                       | L4b         | 1 (4%)                             | 1 (5%)                   |         |
| <b>Disease behavior</b>                                               | B1          | 25 (93%)                           | 16 (80%)                 | 0.201   |
|                                                                       | B2          | 2 (7%)                             | 4 (20%)                  |         |
|                                                                       | B3          | -                                  | -                        |         |
|                                                                       | B2B3        | -                                  | -                        |         |
| <b>Growth delay</b>                                                   |             | 1 (4%)                             | 1 (5%)                   | 0.828   |
| <b>Time between diagnostic endoscopy and start of treatment, days</b> |             | 7 (1-13)                           | 8 (3-17)                 | 0.266   |

**Supplemental Table 2A: Baseline characteristics of patients treated with exclusive enteral nutrition versus oral prednisolone.** Data are presented as n (%) or median (IQR). wPCDAI, weighted paediatric Crohn's disease activity index; CRP, C-reactive protein; ESR, erythrocyte sedimentation rate; SES-CD, Simple Endoscopic Score for Crohn's Disease; †perianal disease comprised inactive fistula, skin tags, or anal fissures.

|                                                                       | FL-IFX (n=27)     | Conventional (n=30) | P value  |       |
|-----------------------------------------------------------------------|-------------------|---------------------|----------|-------|
| <b>Age at diagnosis, years</b>                                        | 15.1 (11.9-16.6)  | 14.1 (11.3-16.1)    | 0.181    |       |
| <b>Male sex</b>                                                       | 15 (49%)          | 18 (54%)            | 0.734    |       |
| <b>Height, cm</b>                                                     | 168 (151-177)     | 161 (143-174)       | 0.136    |       |
| <b>Weight, kg</b>                                                     | 52.0 (34.0-63.0)  | 43.2 (28.8-55.0)    | 0.248    |       |
| <b>wPCDAI</b>                                                         | 57.5 (47.5-65)    | 50 (45-75.6)        | 0.937    |       |
| <b>CRP, mg/L</b>                                                      | 29.0 (12.0-46.0)  | 39.5 (22.0-65.9)    | 0.091    |       |
| <b>ESR, mm/hour</b>                                                   | 35.0 (27.0-55.0)  | 28.0 (18.0-60.0)*   | 0.795    |       |
| <b>SES-CD</b>                                                         | 19 (9-24)         | 17 (6-19)           | 0.869    |       |
| <b>Leukocytes, 10<sup>9</sup>/L</b>                                   | 8.6 (7.4-10.4)    | 9.3 (7.4-12.1)      | 0.895    |       |
| <b>Faecal calprotectin, µg/g</b>                                      | 1045 (684-1228.0) | 1078 (617-1661)     | 0.765    |       |
| <b>Perianal disease†</b>                                              | 2 (7%)            | 7 (23%)             | 0.100    |       |
| <b>Paris classification</b>                                           |                   |                     |          |       |
| <b>Age at diagnosis</b>                                               | <10 years         | 2 (7.5%)            | 5 (17%)  | 0.568 |
|                                                                       | 10-17 years       | 23 (75%)            | 23 (76%) |       |
|                                                                       | 17-40 years       | 2 (7.5%)            | 2 (7%)   |       |
| <b>Disease location</b>                                               | L1                | 8 (30%)             | 5 (17%)  | 0.392 |
|                                                                       | L2                | 5 (18%)             | 9 (30%)  |       |
|                                                                       | L3                | 13 (48%)            | 16 (53%) |       |
|                                                                       | Isolated L4       | 1 (4%)              | -        |       |
| <b>Upper disease location</b>                                         | No upper GI       | 12 (44%)            | 16 (53%) | 0.252 |
|                                                                       | L4a               | 15 (56%)            | 12 (40%) |       |
|                                                                       | L4b               | -                   | 2 (7%)   |       |
| <b>Disease behavior</b>                                               | B1                | 25 (92%)            | 26 (87%) | 0.467 |
|                                                                       | B2                | 2 (8%)              | 4 (13%)  |       |
|                                                                       | B3                | -                   | -        |       |
|                                                                       | B2B3              | -                   | -        |       |
| <b>Growth delay</b>                                                   | 0 (0%)            | 2 (7%)              | 0.172    |       |
| <b>Treated with exclusive enteral nutrition</b>                       |                   | 16 (53%)            |          |       |
| <b>Time between diagnostic endoscopy and start of treatment, days</b> | 9 (6-13)          | 8.5 (2-14.5)        | 0.860    |       |

**Supplemental Table 2B: Baseline characteristics of patients that underwent an endoscopic evaluation at week 10.** Data are presented as n (%) or median (IQR). FL-IFX, first-line IFX; wPCDAI, weighted paediatric Crohn's disease activity index; CRP, C-reactive protein; ESR, erythrocyte sedimentation rate; SES-CD, Simple Endoscopic Score for Crohn's Disease; EEN, exclusive enteral nutrition. \*1 missing data point. †perianal disease comprised inactive fistula, skin tags, or anal fissures.

|                                                                       | FL-IFX (n=18)       | Conventional (n=14) | P value   |       |
|-----------------------------------------------------------------------|---------------------|---------------------|-----------|-------|
| <b>Age at diagnosis, years</b>                                        | 15.5 (11.1-16.6)    | 12.0 (9.4-14.6)     | 0.168     |       |
| <b>Male sex</b>                                                       | 10 (55.6%)          | 8 (57.1%)           | 0.928     |       |
| <b>Height, cm</b>                                                     | 160.9 (146.4-174.3) | 147.9 (135.0-167.6) | 0.193     |       |
| <b>Weight, kg</b>                                                     | 45.6 (31.3-55.5)    | 36.3 (24.9-43.0)    | 0.338     |       |
| <b>wPCDAI</b>                                                         | 56.3 (49.4-73.1)    | 52.5 (45.0-61.9)    | 0.338     |       |
| <b>CRP, mg/L</b>                                                      | 28.5 (7.8-40.3)     | 27.0 (17.8-46.0)    | 0.168     |       |
| <b>ESR, mm/hour</b>                                                   | 39.0 (30.0-40.0)    | 29.5 (19.8-62.5)    | 0.694     |       |
| <b>SES-CD</b>                                                         | 16 (10-23)          | 15 (8-15)           | 0.346     |       |
| <b>Leukocytes, 10<sup>9</sup>/L</b>                                   | 8.6 (7.4-10.4)      | 7.5 (5.4-11.7)      |           |       |
| <b>Faecal calprotectin, µg/g</b>                                      | 1076 (652-1445)     | 1033 (555-1087)     | 0.337     |       |
| <b>Perianal disease†</b>                                              | 2 (6%)              | 7 (23%)             | 0.109     |       |
| <b>Paris classification</b>                                           |                     |                     |           |       |
| <b>Age at diagnosis</b>                                               | <10 years           | 3 (17%)             | 5 (36%)   | 0.250 |
|                                                                       | 10-17 years         | 13 (72%)            | 9 (64%)   |       |
|                                                                       | 17-40 years         | 2 (11%)             | -         |       |
| <b>Disease location</b>                                               | L1                  | 4 (22%)             | 4 (28.5%) | 0.773 |
|                                                                       | L2                  | 4 (22%)             | 4 (28.5%) |       |
|                                                                       | L3                  | 9 (50%)             | 6 (49%)   |       |
|                                                                       | Isolated L4         | 1 (6%)              | -         |       |
| <b>Upper disease location</b>                                         | No upper GI         | 9 (50%)             | 11 (78%)  | 0.073 |
|                                                                       | L4a                 | 9 (50%)             | 2 (14%)   |       |
|                                                                       | L4b                 | -                   | 1 (7%)    |       |
| <b>Disease behavior</b>                                               | B1                  | 17 (94%)            | 10 (71%)  | 0.075 |
|                                                                       | B2                  | 1 (6%)              | 4 (29%)   |       |
|                                                                       | B3                  | -                   | -         |       |
|                                                                       | B2B3                | -                   | -         |       |
| <b>Growth delay</b>                                                   | 0 (0%)              | 1 (7%)              | 0.249     |       |
| <b>Treated with exclusive enteral nutrition</b>                       |                     | 7 (50%)             |           |       |
| <b>Time between diagnostic endoscopy and start of treatment, days</b> | 10 (4-13.3)         | 9 (4-18)            | 0.837     |       |

**Supplemental Table 2C: Baseline characteristics of patients that underwent an endoscopic evaluation at week 52.** Data are presented as n (%) or median (IQR). FL-IFX, first-line IFX; wPCDAI, weighted paediatric Crohn's disease activity index; CRP, C-reactive protein; ESR, erythrocyte sedimentation rate; SES-CD, Simple Endoscopic Score for Crohn's Disease; EEN, exclusive enteral nutrition. †perianal disease comprised inactive fistula, skin tags, or anal fissures.

| Received treatment escalation | First-line IFX  |                | p-value      | Conventional    |                 | P-value      |
|-------------------------------|-----------------|----------------|--------------|-----------------|-----------------|--------------|
|                               | Yes             | No             |              | Yes             | No              |              |
| wPCDAI, median (IQR)          | 17.5 (0.0-35.0) | 0.0 (0.0-22.5) | 0.109        | 21.3 (8.1-31.9) | 10 (0.0-20.0)   | <b>0.020</b> |
| Fcal, µg/g, median (IQR)      | 312 (193-896)   | 89 (34-496)    | <b>0.027</b> | 572 (403-219)   | 139 (93-806)    | <b>0.023</b> |
| CRP, mg/L, median (IQR)       | 2.0 (1.1-4.6)   | 0.7 (0.0-2.6)  | <b>0.003</b> | 10.0 (0.9-26.5) | 4.8 (0.9-8.7)   | 0.277        |
| ESR, mm/hour, median (IQR)    | 12.0 (5.5-24.5) | 3.0 (1.0-6.3)  | <b>0.023</b> | 17.0 (2.8-33.8) | 10.0 (3.0-17.0) | 0.176        |

**Supplemental Table 3: Levels of inflammatory markers after induction treatment in patients that received and did not receive treatment escalation.** Levels are depicted per treatment group. wPCDAI scores, CRP levels and ESR levels are obtained 14 weeks after start of induction treatment. Fcal levels were obtained 10 weeks after start of induction treatment. IFX=infliximab; wPCDAI= weighted paediatric Crohn's disease activity index; Fcal=faecal calprotectin level; CRP=C-reactive protein; ESR=erythrocyte sedimentation rate.

|                                  | First-line IFX<br>(n=47)    | Conventional<br>(n=42)      | P-value |
|----------------------------------|-----------------------------|-----------------------------|---------|
| Baseline QOL score, median (IQR) | 59.6 (49.5-72.0)<br>[n=36]  | 61.1 (49.5-70.9)<br>[n=28]  | 0.660   |
| Week 14 QOL score, median (IQR)  | 81.8 (70.7-86.8)*<br>[n=36] | 77.1 (68.6-85.7)*<br>[n=27] | 0.297   |
| Week 52 QOL score, median (IQR)  | 80.0 (71.4-88.6)*<br>[n=31] | 77.5 (66.6-85.5)*<br>[n=28] | 0.261   |

**Supplemental Table 4: Quality of life assessment based on the IMPACT III questionnaire.** The total IMPACT III score ranges from 0 to 100 with a higher score indicating a better quality of life. IFX=infliximab; QOL=quality of life.

\*significantly higher compared to the score at baseline (p<0.001)
