# Supplementary material for: First-line treatment with infliximab versus conventional treatment in children with newly diagnosed moderate-to-severe Crohn’s disease: an open-label multicentre randomised controlled trial
Source: PubMed Central journal article supplement (PMC8666701; doi:10.1136/gutjnl-2020-322339), 2020-12-31
Supplement: gutjnl-2020-322339supp002.pdf [file gutjnl-2020-322339supp002.pdf]

## Legend Supplemental Figures

**Supplemental Figure 1. Box and whisker plot depicting the median wPCDAI and interquartile range per visit.** P values were calculated with a Mann-Whitney U test. The median wPCDAI at week 22 was considered statistically significant different between treatment groups. Abbreviations: wPCDAI=weighted pediatric Crohn's disease activity index.
